# Supplementary material for: Senegalese artisanal gold mining leads to elevated total mercury and methylmercury concentrations in soils, sediments, and rivers
Source: Oxford University Press journal article supplement (doi:10.1525/elementa.274), 2018-01-01
Supplement: elementa-6-274-s1.pdf [file elementa-6-274-s1.pdf]

## Supplementary Figure

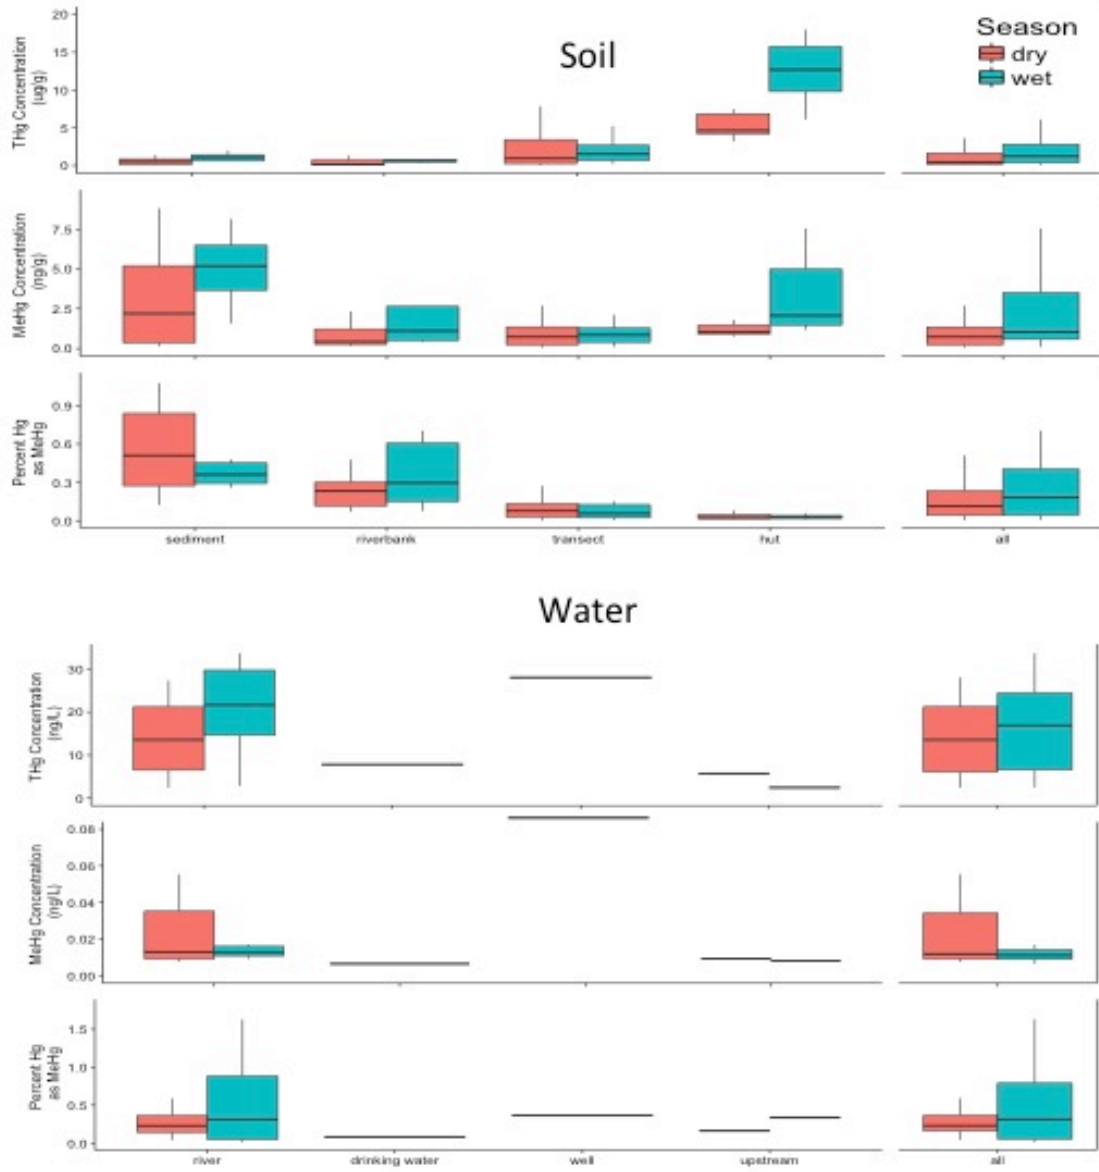

Supplementary Figure 1: Seasonal trends in A) soil and B) water Hg concentrations. Note that outliers have been removed.
